# Supplementary material
Source: publisher figshare collection journal article supplement (https://acs.figshare.com/ndownloader/files/5159323)

## Supporting Information

### Design, Synthesis, and Evaluation of Acyclic C-Nucleoside and N-Methylated Derivatives of the Ribitylaminopyrimidine Substrate of Lumazine Synthase as Potential Enzyme Inhibitors and Mechanistic Probes

Jinhua Chen,<sup>†</sup> Thota Sambaiah,<sup>†</sup> Boris Illarionov,<sup>‡</sup> Markus Fischer,<sup>‡</sup>

Adelbert Bacher,<sup>‡</sup> and Mark Cushman<sup>\*,†</sup>

*Department of Medicinal Chemistry and Molecular Pharmacology, School of Pharmacy and Pharmacal Sciences, Purdue University, West Lafayette, IN 47907 and Lehrstuhl für Organische Chemie und Biochemie, Technische Universität München, D-85747 Garching, Germany*

#### Table of Contents:

|                                                                                                                                                                   |    |
|-------------------------------------------------------------------------------------------------------------------------------------------------------------------|----|
| 6-[1-Fluoro-(3S,4R,5R)-3,4,5,6-tetrahydroxyhexyl]-5-nitropyrimidine-2,4-dione ( <b>20a</b> ).                                                                     | S2 |
| 6-[1-Fluoro-(3S,4R,5R)-3,4,5,6-tetrahydroxy-hexyl]-5-nitropyrimidine-2,4-dione ( <b>20b</b> ).                                                                    | S2 |
| 6-E-(2,3:4,5-Di- <i>O</i> -isopropylidene-D-ribitylidenemethylene)-2,4-dimethoxy-5-nitropyrimidine ( <b>22</b> ).                                                 | S2 |
| 6-[(1R,2S,3S,4R,5R)-1,2,3,4,5,6-hexahydroxyhexyl]-5-nitropyrimidine-2,4-dione ( <b>24</b> )                                                                       | S3 |
| (1S,2R)-1-(2,6-Dimethoxy-5-nitro-pyrimidin-4-yl)-2-(2,2,6,6-tetramethyl-tetrahydro-[1,3]dioxolo[4,5- <i>e</i> ][1,3]dioxepin-4-yl)-ethane-1,2-diol ( <b>25</b> ). | S3 |
| 6-[(1S,2R,3S,4R,5R)-1,2,3,4,5,6-hexahydroxyhexyl]-5-nitro-pyrimidine-2,4-dione ( <b>26</b> ).                                                                     | S4 |
| <i>N</i> -Methylribitylamine ( <b>28</b> ).                                                                                                                       | S4 |
| 5-Amino-6-( <i>N</i> -methyl)ribityl-pyrimidine-2,4-dione hydrochloride ( <b>32</b> ).                                                                            | S4 |
| <sup>1</sup> H NMR Spectrum of <b>17</b>                                                                                                                          | S5 |
| <sup>13</sup> C NMR Spectrum of <b>17</b>                                                                                                                         | S6 |
| <sup>1</sup> H NMR Spectrum of <b>18</b>                                                                                                                          | S7 |
| <sup>13</sup> C NMR Spectrum of <b>18</b>                                                                                                                         | S8 |
| <sup>1</sup> H NMR Spectrum of <b>20a</b>                                                                                                                         | S9 |

<sup>1</sup>H NMR Spectrum of **31** S10

<sup>1</sup>H NMR Spectrum of **32** S11

**6-[1-Fluoro-(3S,4R,5R)-3,4,5,6-tetrahydroxyhexyl]-5-nitropyrimidine-2,4-dione**

**(20a).** To a suspension of Amberlite-IR-120 (H<sup>+</sup>) (3 g) in H<sub>2</sub>O (3 mL) was added **19a** (30 mg) in MeOH (3 mL). The reaction mixture was heated at reflux for 4 h. After it was cooled down, the reaction mixture was filtered and washed with MeOH (3 × 5 mL). Solvent was removed under reduced pressure. Reprecipitation from MeOH and ether gave **20a** as a white amorphous solid (18 mg, 80%). <sup>1</sup>H NMR (300 MHz, CD<sub>3</sub>OD) δ 6.00 (dt, *J* = 5.52, 46.89 Hz, 1 H), 4.05-3.39 (m, 5 H), 2.76-2.07 (m, 2 H). Anal. Calcd. for C<sub>10</sub>H<sub>14</sub>FN<sub>3</sub>O<sub>8</sub>·0.2 Et<sub>2</sub>O: C, 38.37; H, 4.77. Found C, 38.24; H, 4.98.

**6-[1-Fluoro-(3S,4R,5R)-3,4,5,6-tetrahydroxy-hexyl]-5-nitropyrimidine-2,4-dione**

**(20b).** To a suspension of Amberlite-IR-120 (H<sup>+</sup>) (1.5 g) in a mixture of MeOH (3 mL) and H<sub>2</sub>O (3 mL) was added **19b** (20 mg) in MeOH (3 mL). The reaction mixture was heated at reflux for 4 h. After it was cooled down, the reaction mixture was filtered and washed with MeOH (3 × 5 mL). The solvent was removed under reduced pressure. Reprecipitation from MeOH and ether gave **20b** as a white amorphous solid (12 mg, 80%). <sup>1</sup>H NMR (300 MHz, CD<sub>3</sub>OD) δ 6.20-5.95 (m, 1 H), 3.95 (m, 1 H), 3.70-3.45 (m, 4 H), 2.20-1.90 (m, 2 H); <sup>19</sup>F NMR (282 MHz, CD<sub>3</sub>OD solvent with CF<sub>3</sub>COOD as external standard) δ -113.19; ESIMS *m/z* 322 (M-H<sup>-</sup>, 100). Anal. Calcd. for C<sub>10</sub>H<sub>14</sub>FN<sub>3</sub>O<sub>8</sub>: C, 37.16; H, 4.37. Found C, 37.35; H, 4.77.

**6-E-(2,3:4,5-Di-O-isopropylidene-D-ribitylidenemethylene)-2,4-dimethoxy-5-**

**nitropyrimidine (22).** A solution of **14** (1.29 g, 2.81 mmol) and **21** (0.659 g, 2.86 mmol) in dry toluene (30 mL) was heated under reflux under Ar for 24 h. The reaction mixture was cooled to room temperature and the solvent was removed under reduced pressure. The residue was purified by flash chromatography (20 g, 3 × 40 cm column of SiO<sub>2</sub>, hexane-ethyl acetate 3:1), to afford **22** as a glass (1.036 g, 89%). <sup>1</sup>H NMR (500 MHz, CDCl<sub>3</sub>) δ 7.42 (dd, *J* = 4.64, 15.02 Hz, 1 H), 6.78 (dd, *J* = 1.14, 15.02 Hz, 1 H) 4.91 (t, *J* = 5.52 Hz, 1 H), 4.17 (dd, *J* = 7.09, 8.25 Hz, 1 H), 4.05 (s, 3 H), 4.04 (m, 1 H), 4.03 (s, 3 H), 3.95 (m, 1 H), 3.87 (m, 1 H), 1.47 (s, 3 H), 1.38 (s, 3

H), 1.36 (s, 3 H), 1.26 (s, 3 H);  $^{13}\text{C}$  NMR (75 MHz,  $\text{CDCl}_3$ )  $\delta$  163.7, 162.8, 156.2, 140.6, 128.2, 121.7, 109.7, 109.4, 79.0, 77.0, 73.9, 67.4, 55.4, 55.3, 27.3, 26.6, 25.2, 25.1; EIMS ( $\text{MH}^+$ )  $m/z$  412. Anal. Calcd for  $\text{C}_{18}\text{H}_{25}\text{N}_3\text{O}_8 \cdot 1.7\text{H}_2\text{O}$ : C, 48.91; H, 6.48; N, 9.51. Found: C, 48.93; H, 6.40; N, 9.32.

**6-[(1R,2S,3S,4R,5R)-1,2,3,4,5,6-hexahydroxyhexyl]-5-nitropyrimidine-2,4-dione**

**(24).** Compound **23** (0.150 g, 0.337 mmol) and Amberlite-IR-120 ( $\text{H}^+$ ) resin (5.0 g) were heated in refluxing 50% aq MeOH (24 mL) for 4.5 h. After the mixture was cooled to room temperature, it was filtered, and the solvent was removed under reduced pressure. The residue was reprecipitated from MeOH-ether. The precipitate was dried over  $\text{P}_2\text{O}_5$  under vacuum to give **24** as an amorphous solid (0.070 g, 62%):  $^1\text{H}$  NMR (500 MHz,  $\text{D}_2\text{O}$ )  $\delta$  5.47 (s, 1 H), 4.01 (d,  $J = 8.73$  Hz, 1 H), 3.84 (d,  $J = 8.78$  Hz, 1 H), 3.75 (s, 2 H), 3.66 (d,  $J = 11.87$  Hz, 1 H), 3.50 (dd,  $J = 4.99, 11.48$  Hz, 1 H). Anal. Calcd for  $\text{C}_{10}\text{H}_{15}\text{N}_3\text{O}_{10}$ : C, 35.61; H, 4.48. Found: C, 35.44; H, 4.43.

**(1S,2R)-1-(2,6-Dimethoxy-5-nitro-pyrimidin-4-yl)-2-(2,2,6,6-tetramethyl-tetrahydro-[1,3]dioxolo[4,5-e][1,3]dioxepin-4-yl)-ethane-1,2-diol (25).** After a mixture of water (5 mL), *tert*-butyl alcohol (5 mL) and AD-mix- $\beta$  (1.54 g) was stirred at room temperature for 15 min, it appeared as two clear phases. Methanesulfonamide (0.104 g) was added and the mixture was cooled to 0 °C. Compound **16** (0.454, 1.10 mmol) was added at once. The reaction mixture was vigorously stirred at 0 °C for 12 h and then at 15 °C for 72 h. The reaction mixture was cooled to 0 °C and solid sodium sulfite (1.5 g) was added. The mixture was warmed to room temperature and stirred for 1 h. It was extracted with  $\text{CH}_2\text{Cl}_2$  (5  $\times$  10 mL). The organic layer was washed with 1 N NaOH solution (3  $\times$  10 mL) and water (10 mL), and then dried over  $\text{Na}_2\text{SO}_4$ . The solvent was removed under reduced pressure and the residue was purified by flash chromatography (30 g, 3  $\times$  30 cm column of  $\text{SiO}_2$ , hexanes-EtOAc 3:2) to give **25** as a glass (0.264 g, 52%).  $^1\text{H}$  NMR (500 MHz,  $\text{CDCl}_3$ )  $\delta$  5.08 (d,  $J = 8.35$  Hz, 1 H), 4.11 (d,  $J = 5.42$  Hz, 1 H), 4.08 (m, 1 H), 4.06 (s, 3 H), 4.03 (s, 3 H), 4.02 (m, 1 H), 3.96 (m, 3 H), 3.90 (m, 2 H), 1.51 (s, 3 H), 1.40 (s, 3 H),

1.35 (s, 3 H), 1.31 (s, 3 H); EIMS (MH<sup>+</sup>)  $m/z$  446. Anal. Calcd for C<sub>18</sub>H<sub>27</sub>N<sub>3</sub>O<sub>10</sub>·0.75 EtOAc: C, 49.31; H, 6.50. Found: C, 49.13; H, 6.51.

**6-[(1S,2R,3S,4R,5R)-1,2,3,4,5,6-hexahydroxyhexyl]-5-nitro-pyrimidine-2,4-dione**

**(26).** Compound **25** (0.240 g, 0.539 mmol) and Amberlite-IR-120 (H<sup>+</sup>) resin (7.0 g) were heated in refluxing 50% aq MeOH (30 mL) for 4.5 h. After the mixture was cooled to room temperature, it was filtered and the solvent was removed under reduced pressure. The residue was reprecipitated from MeOH-ether. The precipitate was dried over P<sub>2</sub>O<sub>5</sub> under vacuum to give **26** as an amorphous solid (0.080 g, 44%). <sup>1</sup>H NMR (300 MHz, D<sub>2</sub>O) δ 5.46 (s, 1 H), 4.00 (d,  $J$  = 8.73 Hz, 1 H), 3.83 (dd,  $J$  = 2.62, 8.81 Hz, 1 H), 3.75 (s, 2 H), 3.65 (m, 1 H), 3.50 (m, 1 H). Anal. Calcd for C<sub>10</sub>H<sub>15</sub>N<sub>3</sub>O<sub>10</sub>: C, 35.61; H, 4.48. Found: C, 35.32; H, 4.43.

**N-Methylribitylamine (28).**<sup>28</sup> Methylamine (10.0 mL, 2.0 M in MeOH, 20 mmol) was added to a solution of D-ribose (**27**) (3.0 g, 18.3 mmol) in MeOH (40 mL). After the solution was stirred at room temperature for 4 h, PtO<sub>2</sub> (200 mg) was added. The mixture was degassed and hydrogenated at 40 psi for 12 h. The mixture was filtered and solvent was removed to give **28** as a yellow glass (3.0 g, 100%). <sup>1</sup>H NMR (300 MHz, CD<sub>3</sub>OD) δ 3.88-3.51 (m, 5 H), 2.85-2.80 (m, 1 H), 2.70-2.63 (m, 1 H), 2.40 (s, 3 H).

**5-Amino-6-(N-methyl)ribityl-pyrimidine-2,4-dione hydrochloride (32).** Concd HCl (0.5 mL) and Pd/C (20 mg, 10%) were added to a solution of **31** (50 mg, 0.156 mmol) in MeOH (10 mL). The mixture was degassed and stirred under H<sub>2</sub> (1 atm) for 12 h. The catalyst was filtered off and the solvent was removed under reduced pressure. Reprecipitation from MeOH (0.2 mL) and ether (5 mL) gave **32** as pale yellow amorphous solid (35 mg, 70%). <sup>1</sup>H NMR (300 MHz, D<sub>2</sub>O) δ 4.14-3.84 (m, 2 H), 3.70-3.45 (m, 3 H), 3.20-3.28 (m, 2 H), 2.61 (s, 3 H). Anal. Calcd for C<sub>10</sub>H<sub>19</sub>ClN<sub>4</sub>O<sub>6</sub>·4.5 H<sub>2</sub>O: C, 29.45; H, 6.92. Found: C, 29.16; H, 6.69.

Current Data Parameters  
 NAME JC-1V-41  
 EXPNO 10  
 PROCNO 1

F2 - Acquisition Parameters  
 Date\_ 20040720  
 Time 12.39  
 INSTRUM spect  
 PROBHD 5 mm QNP 1H  
 PULPROG zg30  
 TO 15624  
 SOLVENT CDCl3  
 NS 16  
 DS 0  
 SWH 4504.504 Hz  
 FIDRES 0.286307 Hz  
 AQ 1.7343140 sec  
 RG 90  
 DM 111.000 usec  
 DE 158.57 usec  
 TE 300.0 K  
 D1 1.00000000 sec  
 P1 11.25 usec  
 SF01 300.1343765 MHz  
 NUCLEUS 1H

F2 - Processing parameters  
 SI 32768  
 SF 300.133957 MHz  
 WM EM  
 SSF 0  
 LB 0.30 Hz  
 GB 0  
 PC 1.00

1D NMR plot parameters  
 CX 20.00 cm  
 CY 10.00 cm  
 FIP 7.326 ppm  
 F1 2198.87 Hz  
 F2 -0.178 ppm  
 F2 -53.38 Hz  
 PRNCH 0.37521 ppm/cm  
 HZCM 112.61263 Hz/cm

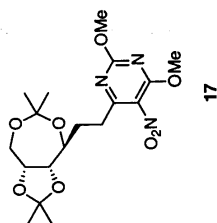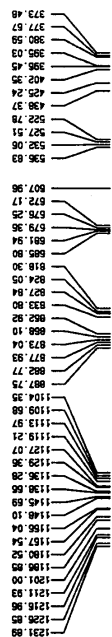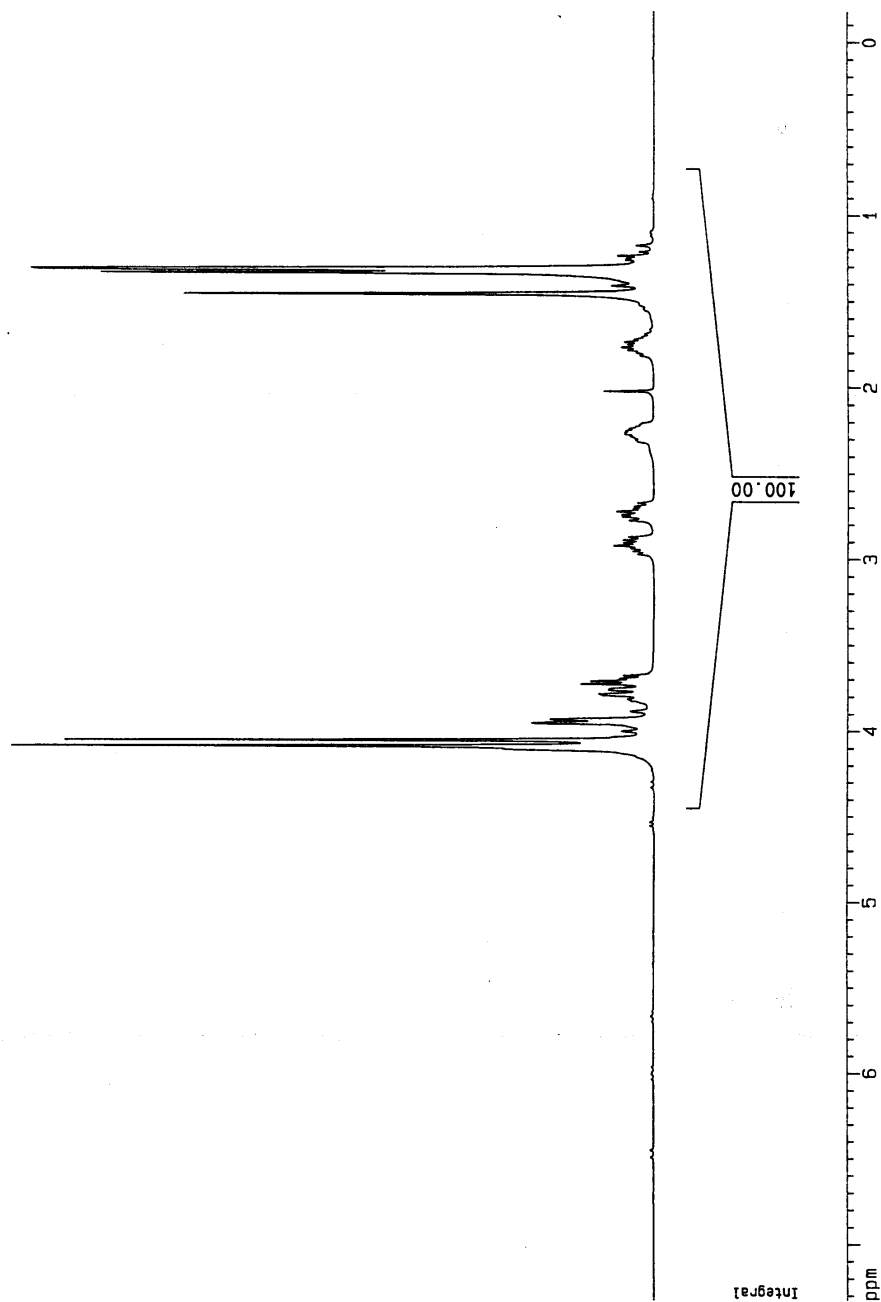



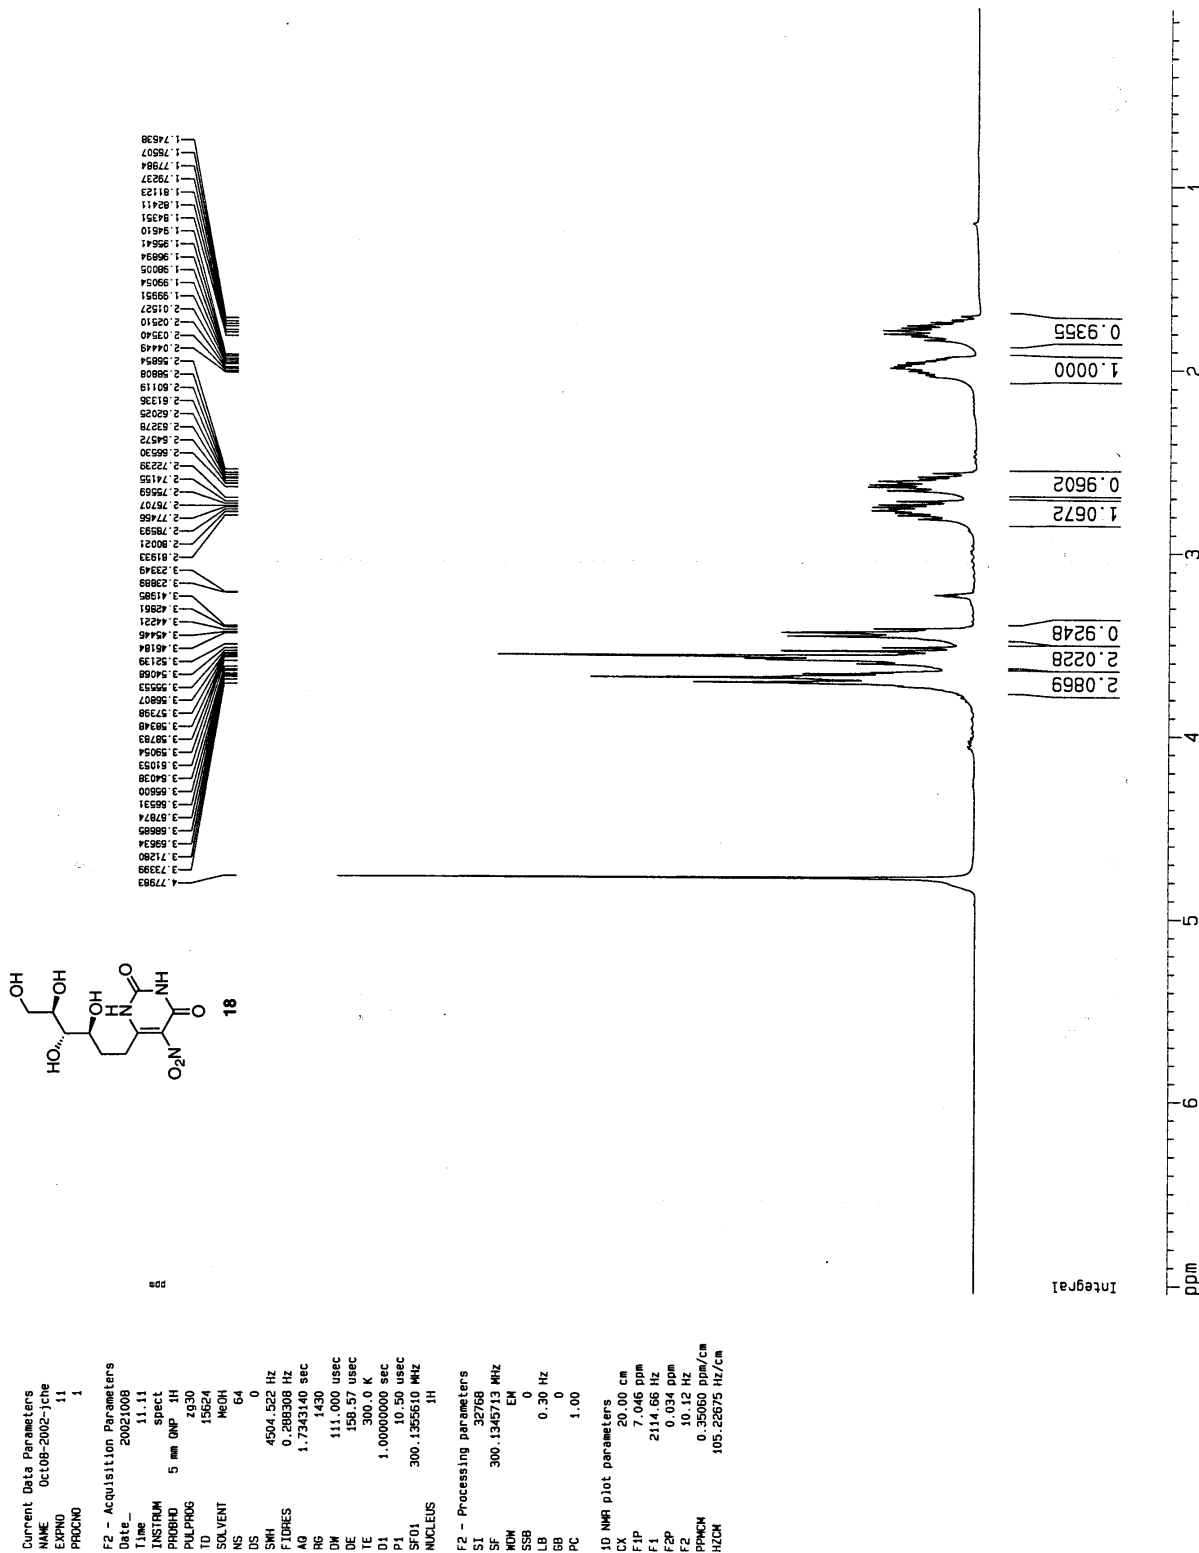

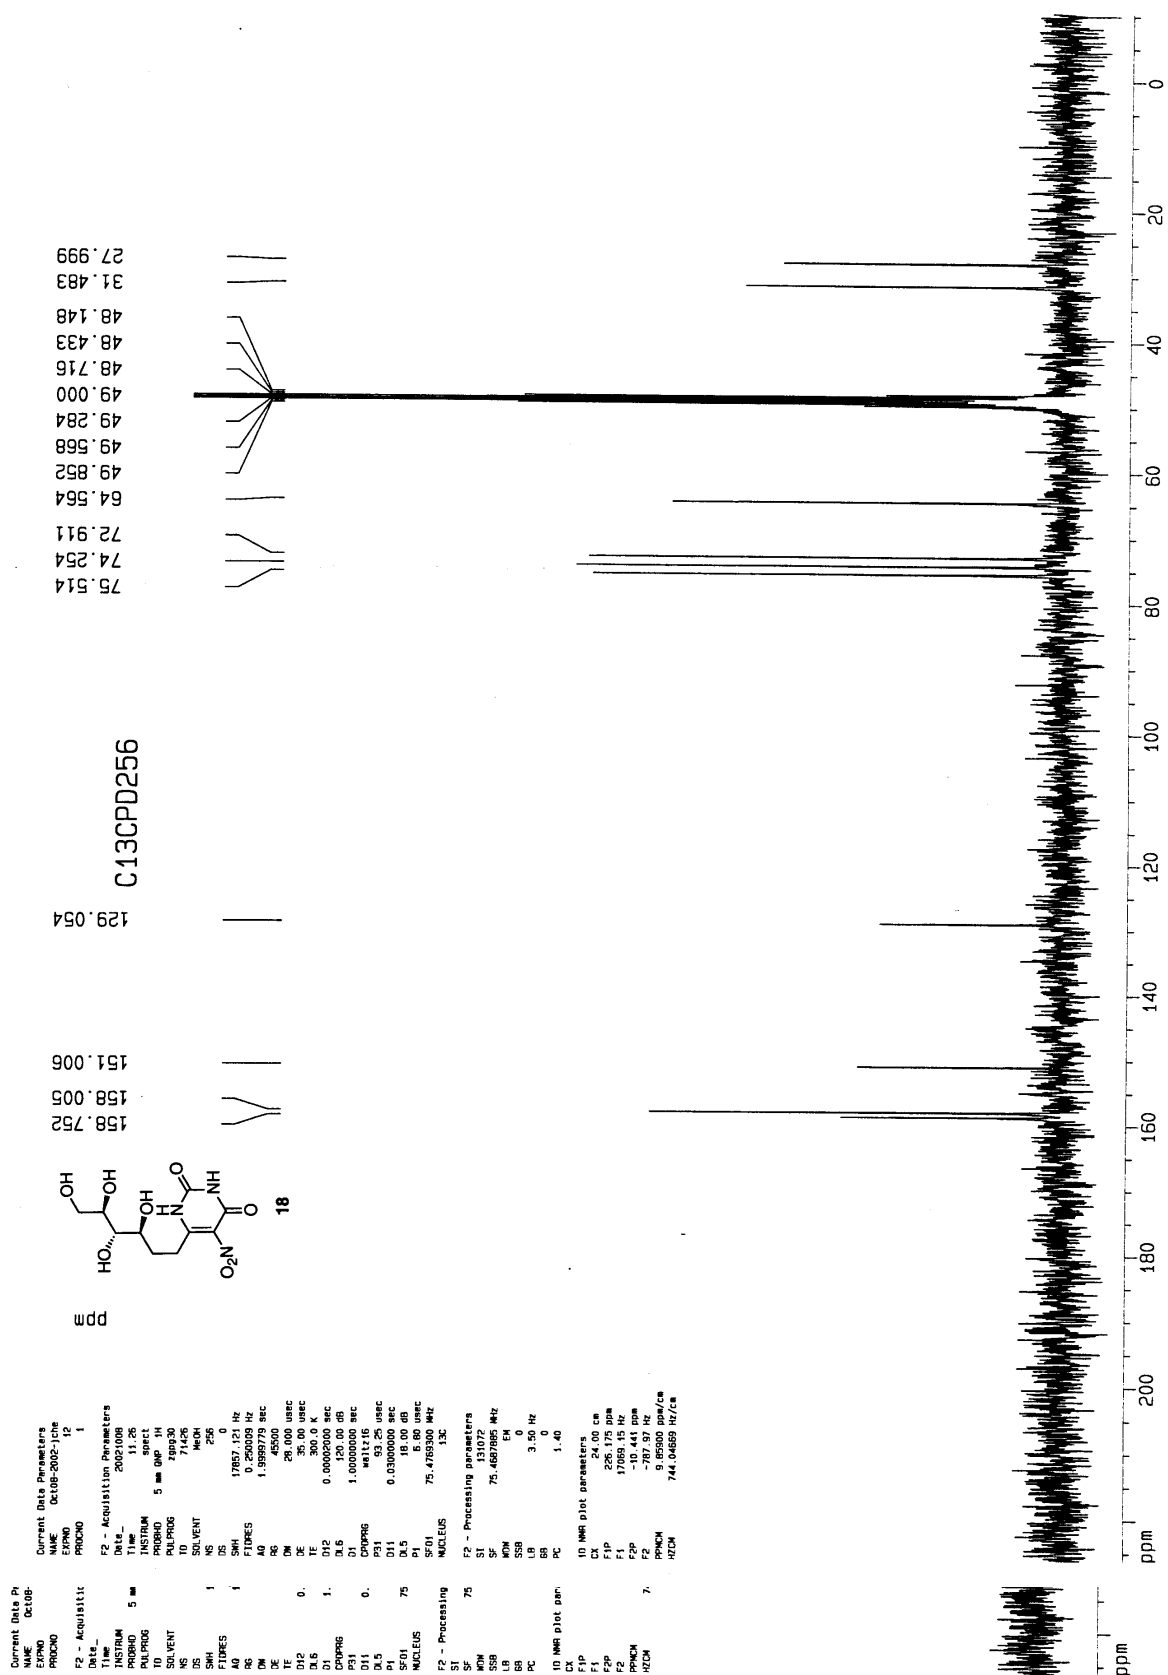



Current Data Parameters  
NAME Feb23-2003-jche  
EXPNO 10  
PROCNO 1

F2 - Acquisition Parameters  
Date\_ 20030223  
Time 22.37  
INSTRUM spect  
PROBHD 5 mm QNP 1H  
PULPROG zgpg30  
TD 15624  
SOLVENT MeOH  
NS 16  
DS 0  
SWH 4504.522 Hz  
FIDRES 0.288308 Hz  
AQ 1.7343140 sec  
RG 11400  
DM 111.000 u  
DE 158.57 u  
TE 300.0 K  
P1 1.00000000 sec  
P2 10.50 u  
SF01 300.1355610 MHz  
NUCLEUS 1H

F2 - Processing parameters  
SI 32768  
SF 300.1345512 MHz  
WDW EM  
SSB 0  
LB 0.30 Hz  
GB 0  
PC 1.00  
ID NMR plot parameters  
CX 20.00 cm  
CY 10.00 cm  
F1P 5.296 DI  
F1 1589.37 Hz  
F2P 2.267 DI  
F2 680.28 Hz  
PPMCH 0.15145 DI  
HZCM 45.45431 Hz

Current Data Parameters  
NAME Aug15-2003-jche  
EXPNO 40  
PROCNO 1

F2 - Acquisition Parameters  
Date\_ 20030615  
Time 18.24  
INSTRUM spect  
PROBHD 5 mm QNP 1H  
PULPROG zgpg30  
TD 15624  
SOLVENT MeOH  
NS 64  
DS 0  
SWH 4504.522 Hz  
FIDRES 0.288308 Hz  
AQ 1.7343140 sec  
RG 1024  
DM 111.000 u  
DE 158.57 u  
TE 300.0 K  
P1 1.00000000 sec  
P2 11.25 u  
SF01 300.1355610 MHz  
NUCLEUS 1H

F2 - Processing parameters  
SI 32768  
SF 300.1345748 MHz  
WDW EM  
SSB 0  
LB 0.30 Hz  
GB 0  
PC 1.00  
ID NMR plot parameters  
CX 20.00 cm  
CY 10.00 cm  
F1P 9.039 ppm  
F1 2712.88 Hz  
F2P 0.006 ppm  
F2 1.87 Hz  
PPMCH 0.45163 ppm/cm  
HZCM 135.55061 Hz/cm

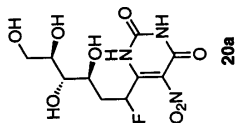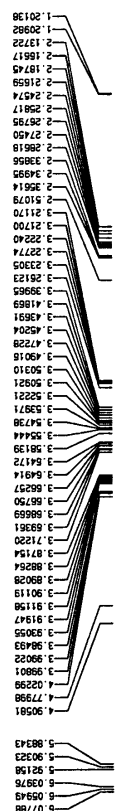

400

Neotria 07

Integral

ppm

Current Data Parameters  
 NAME Feb23-2003-jche  
 EXPNO 10  
 PROCNO 1

## F2 - Acquisition Parameters

Date\_ 20030223  
 Time 22.37  
 INSTRUM spect  
 PROBHD 5 mm QNP 1H  
 PULPROG zg30  
 TO 15624  
 SOLVENT MeOH  
 NS 16  
 DS 0  
 SWH 4504.522 Hz  
 FIDRES 0.286308 Hz  
 AQ 1.7343140 sec  
 RG 11400  
 DM 111.000 usec  
 DE 158.57 usec  
 TE 300.0 K  
 D1 1.00000000 sec  
 P1 10.50 usec  
 SFO1 300.1355610 MHz  
 NUCLEUS 1H

## F2 - Processing parameters

SF 32768  
 SF 300.1345312 MHz  
 WDW EM  
 SSB 0  
 LB 0.30 Hz  
 GB 0  
 PC 1.00

## 1D NMR plot parameters

CX 20.00 cm  
 CY 10.00 cm  
 F1P 5.295 ppm  
 F1 1989.37 Hz  
 F2P 2.267 ppm  
 F2 680.28 Hz  
 PPMCM 0.15145 ppm/cm  
 HZCM 45.45431 Hz/cm

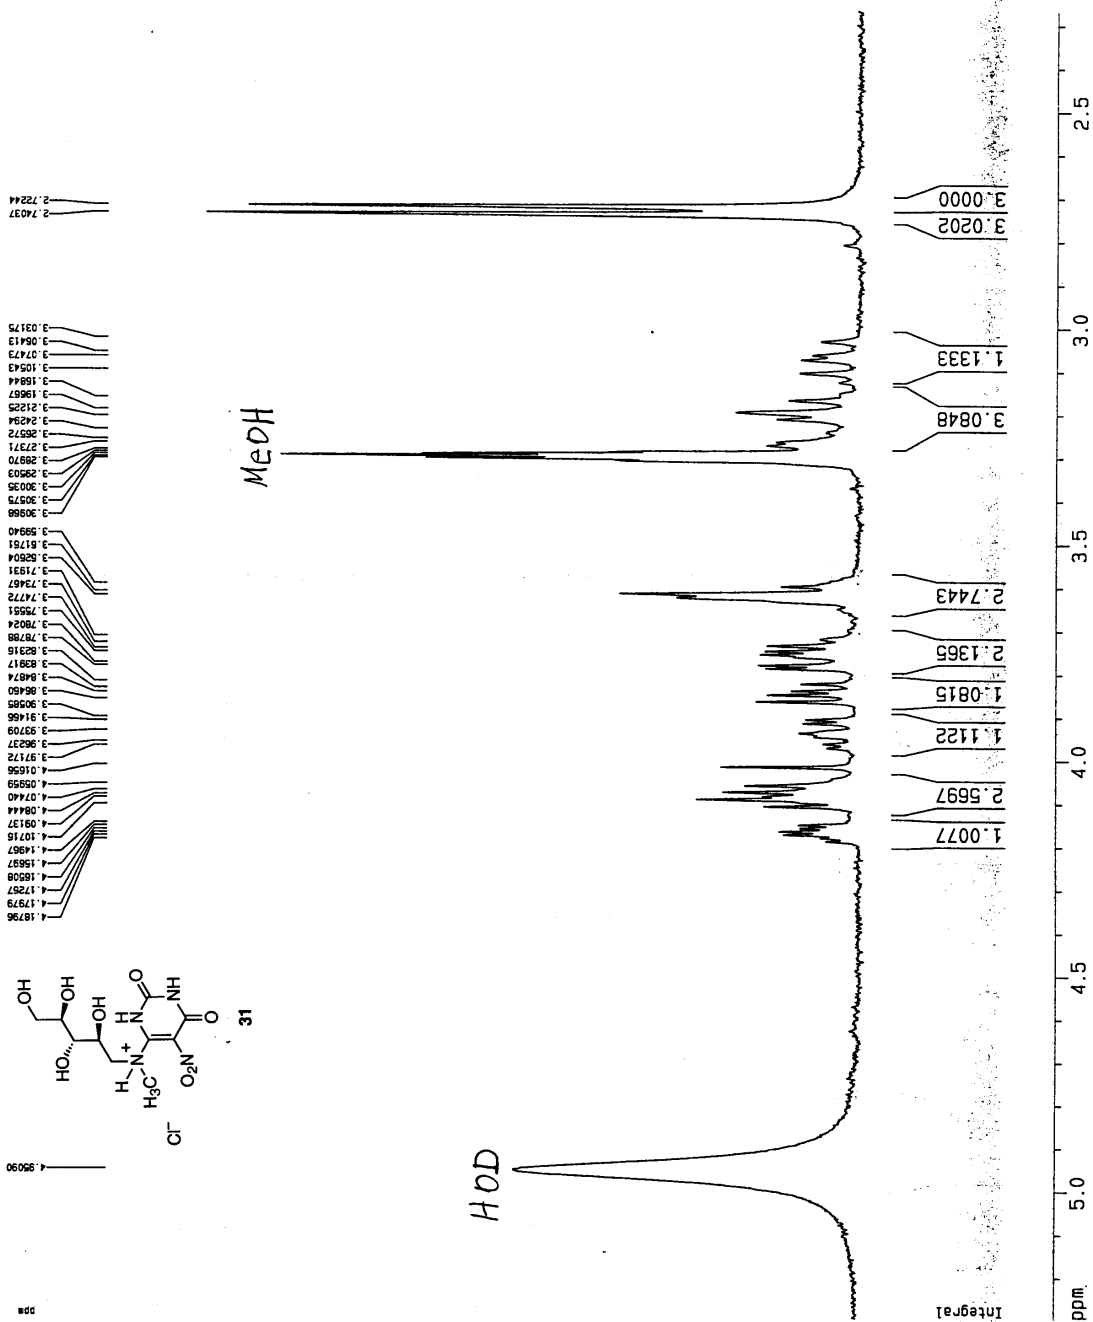

Current Data Parameters  
 NAME Sep15-2003-1che  
 EXNO 10  
 PROCNO 1

F2 - Acquisition Parameters  
 Date\_ 20030915  
 Time 20.31

INSTRUM spect  
 PROBHD 5 mm QNP 1H  
 PULPROG zg30

TD 15624  
 SOLVENT D2O  
 NS 16

DS 0  
 SWH 4504.516 Hz  
 FIDRES 0.288307 Hz

AQ 1.7343140 sec  
 RG 1430  
 DM 111.000 usec

DE 158.57 usec  
 TE 300.0 K  
 D1 1.0000000 sec

P1 11.25 usec  
 SF01 300.1351408 MHz  
 NUCLEUS 1H

F2 - Processing parameters  
 SI 32768  
 SF 300.1341442 MHz

RG 1430  
 DM 111.000 usec  
 DE 158.57 usec

TE 300.0 K  
 D1 1.0000000 sec  
 P1 11.25 usec

SF01 300.1351408 MHz  
 NUCLEUS 1H

F2 - Acquisition Parameters  
 Date\_ 20030915  
 Time 20.31

INSTRUM spect  
 PROBHD 5 mm QNP 1H  
 PULPROG zg30

TD 15624  
 SOLVENT D2O  
 NS 16

DS 0  
 SWH 4504.516 Hz  
 FIDRES 0.288307 Hz

AQ 1.7343140 sec  
 RG 1430  
 DM 111.000 usec

DE 158.57 usec  
 TE 300.0 K  
 D1 1.0000000 sec

P1 11.25 usec  
 SF01 300.1351408 MHz  
 NUCLEUS 1H

F2 - Processing parameters  
 SI 32768  
 SF 300.1341442 MHz

RG 1430  
 DM 111.000 usec  
 DE 158.57 usec

TE 300.0 K  
 D1 1.0000000 sec  
 P1 11.25 usec

SF01 300.1351408 MHz  
 NUCLEUS 1H

F2 - Acquisition Parameters  
 Date\_ 20030915  
 Time 20.31

INSTRUM spect  
 PROBHD 5 mm QNP 1H  
 PULPROG zg30

TD 15624  
 SOLVENT D2O  
 NS 16

DS 0  
 SWH 4504.516 Hz  
 FIDRES 0.288307 Hz

AQ 1.7343140 sec  
 RG 1430  
 DM 111.000 usec

DE 158.57 usec  
 TE 300.0 K  
 D1 1.0000000 sec

P1 11.25 usec  
 SF01 300.1351408 MHz  
 NUCLEUS 1H

F2 - Processing parameters  
 SI 32768  
 SF 300.1341442 MHz

RG 1430  
 DM 111.000 usec  
 DE 158.57 usec

TE 300.0 K  
 D1 1.0000000 sec  
 P1 11.25 usec

SF01 300.1351408 MHz  
 NUCLEUS 1H

F2 - Acquisition Parameters  
 Date\_ 20030915  
 Time 20.31

INSTRUM spect  
 PROBHD 5 mm QNP 1H  
 PULPROG zg30

TD 15624  
 SOLVENT D2O  
 NS 16

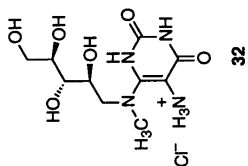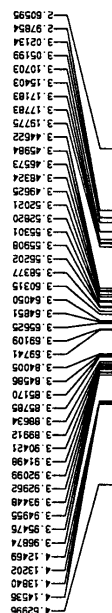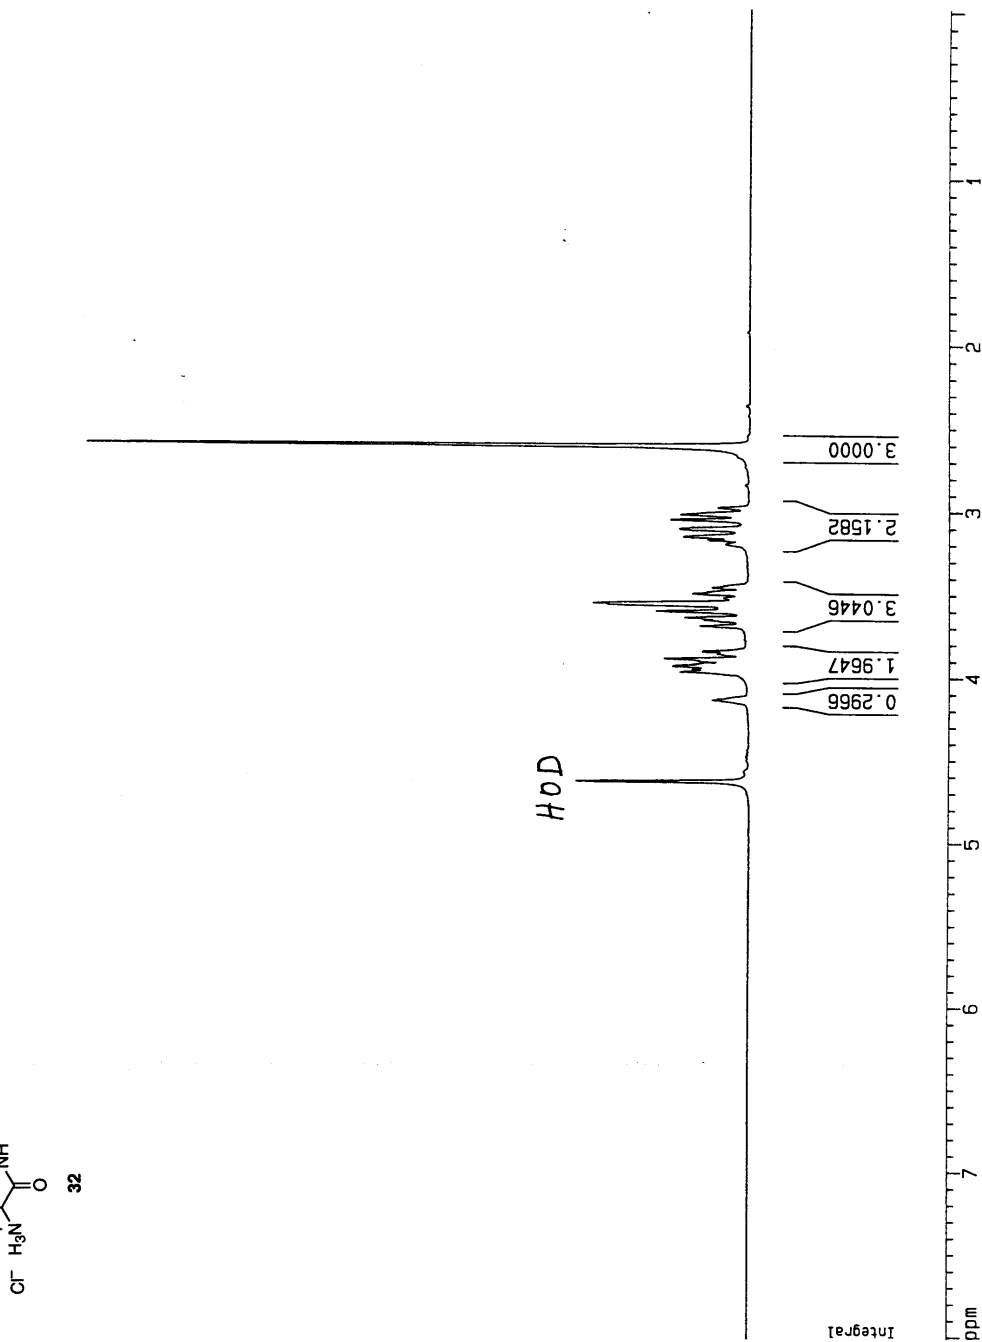

Supplement: Supplementary file 1 [file 5159323]
